# Supplementary material for: Investigating the Metabolism of Plants Germinated in Heavy Water, D2O, and H218O-Enriched Media Using High-Resolution Mass Spectrometry
Source: MDPI journal article supplement (doi:10.3390/ijms242015396), 2023-10-20
Supplement: s1 [file s1]

Table S1. Compounds annotated in garden cress with GC-MS

| RT(min) | Chemical Name                                                                 |
|---------|-------------------------------------------------------------------------------|
| 6.84    | Ethanolamine, 2TMS derivative                                                 |
| 7.34    | Lactic Acid, 2TMS derivative                                                  |
| 7.98    | L-Alanine, 2TMS derivative                                                    |
| 8.24    | Glycine, di-TMS                                                               |
| 9.69    | L-Valine, 2TMS derivative                                                     |
| 10.07   | Urea, 2TMS derivative                                                         |
| 10.25   | Benzoic Acid, TMS derivative                                                  |
| 10.50   | L-Leucine, 2TMS derivative                                                    |
| 10.57   | Glycerol, 3TMS derivative                                                     |
| 10.83   | L-Proline, 2TMS derivative                                                    |
| 10.96   | 2-Butenedioic acid, (Z)-, 2TMS derivative                                     |
| 11.04   | Butanedioic acid, 2TMS derivative                                             |
| 11.35   | Glyceric acid, 3TMS derivative                                                |
| 11.44   | Uracil, 2TMS derivative                                                       |
| 11.49   | 2-Butenedioic acid, (E)-, 2TMS derivative                                     |
| 11.75   | Serine, 3TMS derivative                                                       |
| 12.11   | L-Threonine, 3TMS derivative                                                  |
| 13.04   | Dihydroxymalonic acid, 4TMS derivative                                        |
| 13.40   | Malic acid, 3TMS derivative                                                   |
| 13.82   | L-Aspartic acid, 3TMS derivative                                              |
| 13.83   | L-Aspartic acid, 3TMS derivative                                              |
| 13.83   | L-5-Oxoproline, 2TMS                                                          |
| 13.83   | L-Aspartic acid, 3TMS derivative                                              |
| 14.93   | L-Glutamic acid, 3TMS derivative                                              |
| 15.00   | Phenylalanine, 2TMS derivative                                                |
| 15.10   | Arabinofuranose, 1,2,3,5-tetrakis-O-(trimethylsilyl)-                         |
| 15.54   | Homoserine, 4-imino-N,O-bis(trimethylsilyl)-, trimethylsilyl ester            |
| 16.03   | D-Xylose, 4TMS derivative                                                     |
| 16.61   | Phosphoric acid, bis(trimethylsilyl) 2,3-bis[(trimethylsilyl)oxy]propyl ester |
| 16.86   | 2-Keto-L-gluconic acid, penta(O-trimethylsilyl)-                              |
| 17.10   | D-(-)-Fructofuranose, pentakis(trimethylsilyl) ether (isomer 1)               |
| 17.19   | Citric acid, 4TMS derivative                                                  |
| 17.50   | D-(+)-Talofuranose, pentakis(trimethylsilyl) ether (isomer 2)                 |
| 17.90   | Syringic acid, 2TMS derivative                                                |
| 18.00   | .beta.-D-(+)-Mannopyranose, 5TMS derivative                                   |
| 18.00   | 2,3,4,5,6-Pentahydroxyhexanal, 5TMS                                           |
| 18.24   | 2,4-Dihydroxybenzaldehyde, 2TMS derivative                                    |
| 18.43   | Ethyl .alpha.-D-glucopyranoside, 4TMS derivative                              |
| 18.86   | .beta.-D-Glucopyranose, 5TMS derivative                                       |
| 19.12   | D-Gluconic acid, 6TMS                                                         |
| 19.21   | Palmitic Acid, TMS derivative                                                 |
| 19.53   | Glucaric acid, 6TMS derivative                                                |
| 19.70   | 9,12-Octadecadienoic acid, methyl ester                                       |
| 20.71   | 9,12-Octadecadienoic acid (Z,Z)-, TMS derivative                              |
| 20.76   | 11-Octadecenoic acid, (Z)-, TMS derivative                                    |
| 20.78   | .alpha.-Linolenic acid, TMS derivative                                        |
| 20.87   | D-Glucose, 4-O-[(.beta.-D-glucopyranosyl)], 8TMS                              |
| 20.98   | Stearic acid, TMS derivative                                                  |

|       |                                                                                                 |
|-------|-------------------------------------------------------------------------------------------------|
| 21.06 | Sinapinic acid, 2TMS derivative                                                                 |
| 21.16 | Carbonic acid, monoamide, N-(2-pentyl)-N-hexadecyl-, propargyl ester                            |
| 21.90 | 2-O-Glycerol-.alpha.-d-galactopyranoside, hexa-TMS                                              |
| 22.41 | 11-Eicosenoic acid, (Z)-, TMS derivative                                                        |
| 22.62 | Arachidic acid, TMS derivative                                                                  |
| 23.29 | 2-Phenylethyl .beta.-D-glucopyranoside, 4TMS derivative                                         |
| 23.80 | 1-Monopalmitin, 2TMS derivative                                                                 |
| 24.30 | .alpha.-D-glucopyranose, 1-O-(3-O-(2-methylbutanoyl)-.alpha.-D glucopyranosyl), 7TMS derivative |
| 24.56 | Sucrose, 8TMS derivative                                                                        |
| 25.08 | 1-Monooleoylglycerol, 2TMS derivative                                                           |
| 25.14 | 1-Linolenoylglycerol, 2TMS derivative                                                           |
| 25.41 | D-Trehalose 8TMS                                                                                |
| 28.37 | 3,5,7-Trihydroxy-2-(4-hydroxyphenyl)-4H-chromen-4-one, 3TMS                                     |

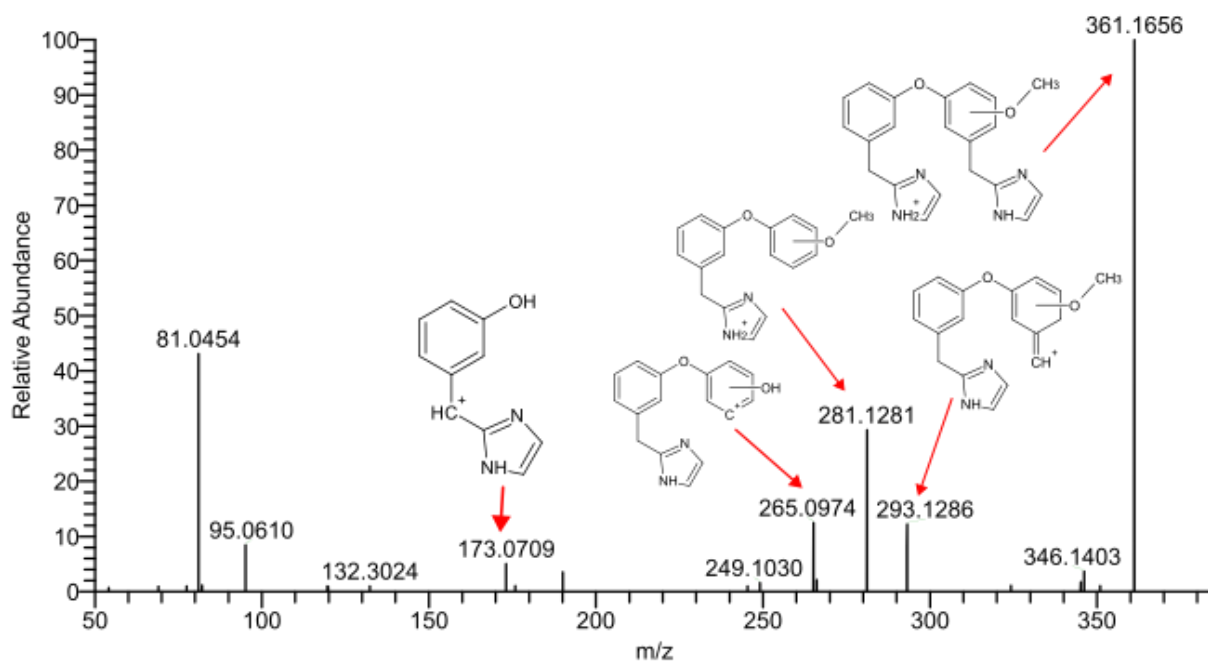

Figure S1. Manual interpretation of MS/MS spectrum on the example of Lepidine A/C.

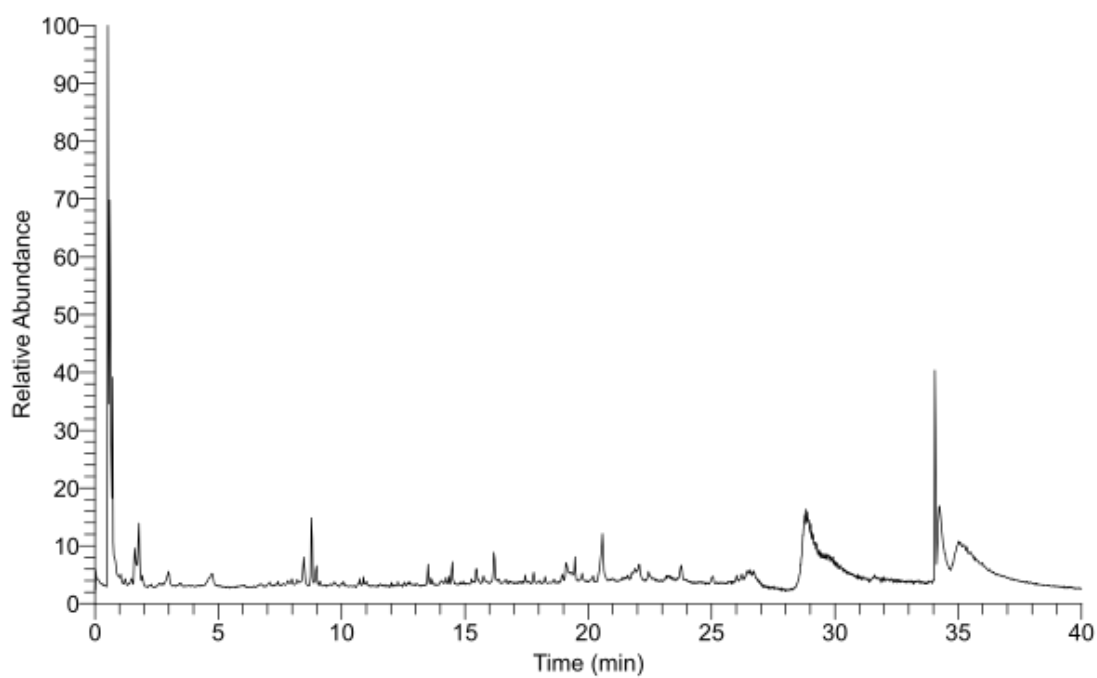

Figure S2. A representative negative ionization mode TIC chromatogram of an extract of *Lepidium sativum* germinated on H<sub>2</sub>O.
